# Supplementary material for: Single-Cell Transcriptomic Heterogeneity in Invasive Ductal and Lobular Breast Cancer Cells
Source: Oxford University Press journal article supplement (doi:10.1158/0008-5472.can-20-0696), 2020-11-04
Supplement: 00085472can200696-sup-238478_3_supp_6636192_qhxvzw.xlsx [file 00085472can200696-sup-238478_3_supp_6636192_qhxvzw.xlsx]

## Sheet: SCENIC Regulon Activation
	MCF7	T47D WT	T47D KO	MM134	SUM44	BCK4	MCF10A	HEK293T
ATF1	1	0	1	1	0	0	0	0
ATF3	0	0	0	1	0	0	0	0
ATF4	1	0	0	1	0	0	0	0
ATF6B	0	0	0	0	0	0	0	0
BACH1	0	1	1	0	1	1	1	1
BHLHE40	1	1	1	1	1	1	1	1
BRF2	1	1	1	1	1	1	0	0
CEBPB	0	0	0	1	0	1	0	0
CEBPG	1	1	1	1	1	1	0	1
CEBPZ	0	0	0	0	1	0	0	0
CREB1	0	1	1	1	1	1	1	1
CREB3L4	0	0	0	0	0	0	0	0
CTCF	0	0	1	1	0	1	0	0
E2F1	1	0	0	0	0	0	0	1
E2F2	0	0	0	0	0	0	0	0
E2F4	1	0	1	1	0	1	1	1
E2F6	0	0	0	0	0	0	0	0
E2F7	0	0	0	1	0	0	0	1
E2F8	0	0	0	0	0	0	0	0
EGR1	1	0	0	1	1	1	0	0
ELF1	1	1	0	1	1	1	1	0
ELF2	0	0	1	0	0	0	0	0
ELK1	0	0	0	0	0	1	0	0
ESRRA	1	1	1	0	1	1	1	1
ETS2	1	0	0	0	1	1	0	0
FOS	0	0	0	0	0	1	0	0
FOSL1	0	0	0	0	0	1	1	1
FOSL2	1	0	1	1	0	1	1	1
GABPA	0	0	0	0	0	1	0	0
IRF1	1	0	1	1	0	1	1	0
IRF3	0	0	0	0	0	1	0	0
JUN	0	0	0	0	0	1	0	0
JUND	1	0	0	0	0	1	0	0
KDM5B	0	0	1	1	0	1	0	1
KLF4	0	0	0	0	0	1	0	0
KLF6	0	0	0	0	0	1	0	0
MAZ	0	0	0	1	1	0	0	0
MXI1	0	0	0	1	0	0	1	1
MYC	1	1	1	1	0	1	1	1
NFYA	1	1	1	1	1	1	0	1
NFYB	1	0	0	1	0	0	0	1
NR3C1	1	0	1	1	1	1	1	1
PBX3	0	1	1	1	1	1	0	1
RELA	0	1	0	0	0	0	0	0
REST	0	0	0	0	0	0	0	0
RFX5	0	0	1	1	0	1	0	1
SP1	0	0	0	1	0	1	0	0
SP2	0	0	1	1	1	1	0	1
SPDEF	1	1	1	1	1	1	0	1
SREBF2	0	0	1	1	0	1	0	0
SRF	0	1	0	1	0	1	1	0
TBP	1	0	1	1	0	0	0	1
TEAD2	1	1	1	0	1	1	0	0
TFDP1	1	1	0	1	0	1	1	1
THAP1	0	0	1	0	0	0	0	1
THAP11	1	1	1	0	0	0	1	1
USF1	0	1	0	0	1	1	0	1
USF2	1	0	1	0	1	1	0	1
YY1	0	0	0	0	0	1	0	0
ZBTB7A	0	0	0	0	0	1	0	0

## Sheet: SCENIC Deduced Regulons
TF	Targets
ATF1	ACAA2	ACADSB	ADGRL2	AKAP11	ANKS1A	ATG101	BBIP1	BCAS2	BCAS3	BRAF	BTBD10	BTG2	C11orf1	CCAR1	CCDC9	CCNG2	CCT2	CD63	CDC5L	CDK4	CEBPB	CEP120	CHPF	COX4I1	CREM	CRNDE	CSDE1	CSK	CSNK1A1	CTNNA1	CTNNBL1	CUL3	CUTA	CYC1	CYCS	CYFIP2	DDX18	DDX5	DLEU2	DNAJC27	DNTTIP1	DPYSL2	DTL	DUSP3	EIF2B1	EIF3A	EMD	EPB41L1	EPPK1
ATF3	ABHD11	ABRACL	ACO2	ACTG1	ADAM9	ADGRB2	ADM	AHI1	AKAP12	AMD1	ANKHD1	ANP32A	AP2S1	AP5Z1	APEX1	APP	AR	ARF1	ARHGAP29	ARHGEF16	ARID5B	ARIH1	ARL4A	ARPC3	ARPP19	ASNS	ASPHD1	ATAD2	ATAD5	ATF3	ATF4	ATF7IP	ATG101	ATG2A	ATP1B3	ATP6AP2	ATP6V0B	ATP6V0E1	ATRAID	ATXN1	AZIN1	BAMBI	BAZ1B	BCAS2	BLOC1S1	BLVRB	BMP4	BTBD19	BTG1
ATF4	AARS	ACTG1	AHCYL1	AKIRIN1	ANKRD9	ARPP19	ATF4	BCAS2	BLOC1S1	BOD1L1	BRD2	BTAF1	CCNI	CDC42EP1	CEBPB	CEBPG	CEP57	CHAC1	CLK4	CUTA	CYCS	DDX5	ECSIT	EEF2	EIF1	EIF3D	EIF3H	FAM107B	FHL2	GAK	GARS	GNPNAT1	GOT1	GYG1	HERPUD1	HNRNPH2	IARS	JOSD1	LARS	LHFPL2	MAP1B	MAPRE2	MYL6	NEAT1	NEDD9	NEMF	NOVA1	NUPR1	OXSR1
ATF6B	ALS2	ARID5B	CBWD3	CCND2	CDC25C	GAPDHS	IRF2BP2	MYH14	NUDT18	POFUT1	SLC38A1	SPICE1	SSR4	TRIB3	WBP1L	WSB1	YWHAH	ZGRF1
BHLHE40	AATF	ABHD15	ACOX1	ACTG1	ACTN4	ACTR3	ACTR3C	ACYP1	ADAM10	ADAR	ADIPOR1	ADPRHL2	AHCTF1	AKIRIN1	ALKBH5	ALX3	ANAPC4	ANKMY1	ANKRD13D	ANKS1A	ANO9	ANXA4	AP1G1	AP1S2	AP2A1	AP2M1	APC2	APEH	ARAF	ARAP1	ARAP2	ARF4	ARFGEF1	ARFIP2	ARID5B	ARL3	ARMC3	ARPC2	ARPC3	ARPC5	ASCC2	ASNSD1	ATP6V0D1	ATP6V0E1	ATP6V1E1	ATP6V1F	ATXN10	ATXN7L3B	B3GALT4
BRF2	AAK1	AAMDC	AAMP	ABHD17A	ACBD3	ACER3	ACIN1	ACOT7	ACTB	ACTG1	ACTR3	ACTR6	ADAM9	ADPRHL2	AFTPH	AGPAT1	AGPAT3	AHCYL1	AHSA1	AK3	AKAP8L	AKIRIN2	ANAPC11	ANAPC16	ANKS1A	ANP32A	ANXA5	AP1S2	AP2S1	AP5M1	APMAP	ARF1	ARF5	ARF6	ARFIP2	ARHGEF16	ARL3	ARMCX3	ARPC2	ARPC3	ARPC5L	ASB6	ASB8	ASNA1	ATF2	ATF4	ATG101	ATG5	ATL3
CEBPB	AATF	ABAT	ABCC5	ABCF3	ACADVL	ACBD3	ACIN1	ACTB	ACTG1	ADARB1	ADPRHL2	AFTPH	AGPAT1	AHCYL1	AHDC1	AHSA1	ALKBH3	ALYREF	AMD1	AMOTL2	ANAPC11	ANAPC16	ANAPC4	ANKRD17	ANXA5	AP1B1	AP1M1	AP1S2	AP2S1	APMAP	APOM	APPL2	APTX	ARF1	ARF4	ARFGAP1	ARHGDIA	ARID4A	ARID5B	ARIH1	ARL3	ARL5B	ARPC1A	ARPC2	ARPC3	ARPC5L	ASB16-AS1	ASCC2	ASH1L
CEBPZ	ABHD11	ABR	ACACA	ACAT2	ACTB	ACVR1	ADAM10	ADIPOR2	AFTPH	AHCY	AIMP2	ANKRD40	ANKRD54	APBB2	ARPC3	ATP6V0A1	ATP6V1C1	BCAR1	BCL9L	BEX3	BTG1	C19orf48	C20orf27	CALR	CANX	CASC4	CBFA2T2	CBX1	CDC25A	CDC42	CDC45	CGN	CIB3	CLASP1	CLPTM1	COTL1	COX5A	CSE1L	CTNNA1	CUEDC2	CWC25	DBI	DDT	DDX39A	DDX46	DDX5	DHX30	DHX8	DLST
CREB1	ACTR2	AQP5	BCL7A	CASP8AP2	CD164	CNOT2	COG4	CREB3L2	DR1	EFNA3	EIF3D	FAM20B	FBXO34	GMPR2	GPR137C	GTF2F1	IFT81	IVNS1ABP	MCM2	MRPL28	OSBPL8	PBX3	POLDIP3	PRX	SEC24A	SENP2	TAF10	THUMPD3	TMF1	TRMT5	TSTD1	XPO1	ZNHIT1
CREB3L4	ABAT	ABHD11	ARF1	ARFGEF3	ATF4	ATXN10	C11orf45	CD164	CLDN3	CLTC	COMTD1	COPB2	CRB3	DAP	DCAF12	DCTN4	DDX1	DESI2	DNAJC1	EMP2	ERLEC1	FAM167A	FAM168A	FBXW7	FRAT2	GOLGA5	GOLGB1	HDLBP	HERPUD1	HID1	HMGB1	IDH3G	IRF2BP2	ISOC2	KDM5B	KRTCAP2	LAMP1	LHFPL2	2020-03-09	MIA3	MLEC	MMAB	NAPA	P4HB	PCBP1	PEF1	PIP4K2C	PTPRF	QRICH1
CTCF	AHCY	AK6	AP1G1	ARHGAP35	ARMC1	ASNA1	ATF7IP	ATXN10	BAK1	BBS4	BCLAF1	BRK1	BTAF1	BTG3	C12orf65	CA14	CANX	CAPZB	CARHSP1	CBX1	CCAR1	CCNL2	CD164	CDKN2C	CENPF	CHRNA5	CISD3	CKAP5	COX6B1	CPNE1	CREB1	CRIPT	CSE1L	CSNK1A1	CSTF3	CTCF	CYB561	DCAF10	DGAT1	DHX8	DNAJB1	DPYSL2	DSN1	EIF1	EIF2B2	EIF4G2	EIF5AL1	EME1	EMP2
E2F1	ABCA3	ABCF1	ABHD11	ABHD14A	ABHD5	ACAP2	ACBD5	ACBD6	ACTL6A	ACYP1	ACYP2	ADAM15	ADCK5	ADGRG1	ADGRL1	ADIPOR1	ADO	ADORA2B	ADSS	AEN	AGO2	AGR2	AHCTF1	AHCY	AHCYL1	AIF1L	AKAP7	AKAP8	AKIP1	ALG5	ALG8	ALKBH2	ALS2CL	AMD1	AMER1	AMIGO2	ANAPC11	ANAPC16	ANAPC5	ANAPC7	ANKRD11	ANKRD9	ANO1	ANP32B	ANXA5	AP2S1	AP3B2	APEX2	APH1A
E2F2	AKAP7	ALKBH5	ARGLU1	ASF1B	ATAD2	ATAD5	BARD1	BAZ1B	BRI3BP	C17orf58	C19orf48	C1orf112	CALR	CAMTA1	CCNE2	CDC45	CDC6	CDT1	CHAF1A	CKMT2-AS1	CLSPN	CPSF7	CRLF3	CWC22	DCTPP1	DDX46	DEK	DLST	DNMT1	DSCC1	DUT	E2F1	E2F2	E2F3	E2F8	ECE1	EIF4A1	EIF4EBP2	ELOVL6	EZH2	FAM111B	FAM213A	FANCI	FBL	FBXO5	FECH	FMNL3	GINM1	GINS2
E2F4	ABHD2	ACTB	ACTG1	ADGRF3	ADIPOR2	ANKRD9	B4GALT3	BAHD1	BARHL2	BRCA1	BRPF1	BTAF1	CACYBP	CAMKK1	CCDC51	CCNI	CEP250	CEP57L1	CKS1B	COX5B	DDT	DHX34	DNAJC7	DUSP6	E2F4	EAPP	EARS2	ECE1	EIF4A1	ELK3	EXOSC1	EXOSC4	GAD1	GPS1	GTF3C1	HNRNPL	HNRNPUL1	HPCAL1	HSBP1	HSP90AB1	HYAL2	ITGB1BP1	KIF5B	LARP4	LMNA	LRFN1	MAPK6	MED10	METTL2B
E2F6	ACTG1	ACVR2A	ADGRL2	ARPC5	ATAD2	ATF1	ATF7IP	AZIN1	BAG6	BAZ1B	CBARP	CCND1	CPNE1	DEK	DTX2	E2F6	EGFL7	EYA3	FMR1	GINS2	GON4L	HES1	HM13-AS1	HMGN1	L1CAM	MAD2L2	MLF2	NTRK2	PHF3	PPIG	PSMB7	PSMC3IP	PTCD1	RFK	SAYSD1	SGTA	SIX2	SPOP	SRRM1	SSRP1	SUMO2	TBC1D17	TDRP	TFAP2B	TSC1	WRB
E2F7	ARF6	ATAD2	BAZ1B	BEGAIN	C2CD2	CCNB1IP1	CD164L2	CLSPN	CRACR2B	CTIF	DMBX1	DNMT1	DUT	E2F1	E2F7	ELOVL6	FAM111A	FAM111B	FBXO5	GATA2	GCHFR	GMNN	GMPS	HEG1	HELLS	HMGA1	HNRNPD	INAFM1	LIMCH1	LYRM2	MCM10	MCM3	MCM4	MCM6	MCMBP	MELK	MICALL2	MTHFD1	NASP	PAQR4	PCNA	PEX2	POLD3	POLE	POLE2	PPM1B	PPM1G	PRKCE	RFC4
E2F8	ABCA1	ABHD17B	ACTL6A	ADGRB2	ANP32B	AP2S1	AP4M1	APEX2	APOO	ARGLU1	ARHGEF28	ATAD2	ATAD3A	ATAD5	BARD1	BAZ1B	BCOR	BDH1	BRCA2	BRI3BP	BUB3	C1orf112	C3orf14	CA3-AS1	CCDC174	CCNE2	CCP110	CDC25A	CDC25B	CDC45	CDC6	CDK1	CDKN1B	CDKN2C	CDT1	CENPH	CENPQ	CEP57	CHAF1A	CKMT2	CLASP2	CLSPN	CLUH	COX17	CTNNB1	CYB5B	DCK	DCTPP1	DCUN1D4
EGR1	AACS	ABCE1	ABHD10	ABHD14A	ACADVL	ACIN1	ACKR3	ACTG1	ACTN1	ACTR3	ACYP1	ADIPOR1	ADO	AFF1	AGAP3	AGK	AGL	AGRN	AHCYL1	AHSA1	AIFM1	AIP	AKAP11	AKIP1	AKIRIN1	ALCAM	ALPK3	ALYREF	ANAPC11	ANAPC13	ANAPC16	ANKIB1	ANKRD13D	ANKRD31	ANKRD42	ANO8	ANP32A	ANXA4	ANXA7	AP1B1	AP2S1	AP3B1	AP3D1	AP3M1	APAF1	APEH	APH1A	APP	APRT
ELF1	AAK1	ACOT13	ACTG1	ACTR3	ADI1	AGR2	AHCTF1	AHCYL1	AKAP8	AKIRIN2	ALKBH1	ANAPC13	ANKRD17	APTX	ARFIP1	ARHGAP27	ARID1B	ARID4A	ARID4B	ARMC9	ARV1	ASAP1	ASCC2	ATAD1	ATE1	ATG12	ATP1B1	ATP6V0E1	ATXN10	ATXN7L1	AZI2	BBIP1	BCAP31	BRCA2	BTF3	C12orf66	C2CD2L	CAAP1	CAMSAP2	CAP1	CAPG	CAPZA1	CCDC102A	CCDC124	CCNI	CCNYL1	CCT2	CD164	CDC42SE1
ELF2	ANAPC11	ARID2	ARL5B	ARRB2	ATF4	BCAT2	BCL9L	BIRC6	BMS1	CAAP1	CEP295	CLEC11A	CNOT6L	COG4	CTDNEP1	DDX39B	DLGAP4	DNAJA1	DPH3	EAPP	EHD4	ELF2	FZD5	GAPVD1	GOLGA7	HAT1	HSBP1	KIF20B	LARS	MAP2K1	MAP3K1	MCM7	MCRS1	MFN2	MGA	MORF4L2	MSL1	NGDN	NME1	NUDC	OTUD5	PAFAH1B1	PDSS1	PEX12	PLEKHH2	POLR2F	POLR2G	POLRMT	POP5
ELK1	AAR2	ABHD2	ACADVL	ACTB	ACTR2	ACTR3	ADI1	ADPGK	AHCYL1	AK6	ANXA5	AP2M1	ARHGAP5-AS1	ARHGEF3	ARHGEF6	ARID4A	ARL3	ARV1	ASAP1	ATF4	ATG101	ATG12	ATXN2L	AUP1	BCL2	BTF3L4	BUB3	C10orf88	C11orf1	C12orf10	C16orf72	C18orf25	C19orf48	C1orf21	C3orf38	CALR	CBX3	CC2D1A	CCM2	CDC27	CEP120	CEP57	CFAP97	CHCHD5	CLPP	CLTC	CMTR2	COPE	COX7B2
ESRRA	AATF	ACBD3	ACTB	ADAL	ADAM15	ADI1	AGPAT1	AGPAT3	AKIRIN2	ALS2	ANAPC11	ANAPC16	ANKRD9	ANKS1A	AP1B1	AP2S1	AP3S2	APMAP	APOM	APPL2	ARF1	ARF4	ARFIP2	ARPC3	ASB6	ASCC1	ASH1L	ASNA1	ATF4	ATG12	ATP6V0B	ATP6V0E1	ATXN10	AURKAIP1	B3GAT3	B9D2	BANF1	BCL11B	BLOC1S1	BORCS5	BRAP	BRK1	BROX	C12orf10	C16orf91	C1orf43	C7orf43	CALR	CAPZB
FOS	AAMDC	ABHD11	ABHD17A	ABHD2	ABR	ACSL1	ACTN1	ACVR1B	ADAM9	AGBL5	AHCY	AHNAK2	AIMP2	AKAP8L	ALG12	AMD1	ANAPC16	ANKRD9	ANXA2	AP2A1	AP2S1	ARAF	ARF5	ARFGAP3	ARFIP2	ARHGDIB	ARID1B	ARID4B	ARL6IP6	ARRDC2	ASCC2	ASPH	ATF3	ATRX	ATXN2	B9D2	BAG3	BARD1	BCAP31	BCL2	BCL2L1	BCL2L12	BTG1	BUB3	C14orf28	C1GALT1C1	C20orf27	C5orf51	C8orf59
FOSL2	BRINP3	CLDN4	DUSP1	FOSL2	JUNB	MAPRE2	MICALL1	PKM	PMEPA1	RTN4	TPM1	TTLL10	UNK	ZMIZ1
GABPA	AAGAB	ACTG1	ADA	AIFM1	ASAP2	ASIC1	ATAD2	ATG12	CCDC85B	CCT2	CEP95	CFL1	COQ5	CRKL	CUL4B	DCAF7	DDX39B	DEK	DGUOK-AS1	DSCC1	EAF1	EIF4G2	EPC1	EPHA7	GABPA	GTF2F1	HEXIM2	HNRNPA2B1	HSP90AA1	HSPA4	HUWE1	ILKAP	INO80	KIAA0232	KPNA4	KRAS	LYN	MAPK1IP1L	MFSD13A	MTHFD1	MUC1	NCAPD2	NCBP3	NOM1	NONO	NOP56	NPHP4	PEF1	PGAM1
IRF1	AGPAT2	AZIN1	CORO6	CRABP2	CSNK1D	CYB5R1	GMIP	GOLGA6L4	GPBP1	IRF1	ISOC2	KLF3	NR1H2	OLFM2	RAB8A	SEMA3B	SESN1	SF3B4	SLC41A1	SOX2	UBE4B	YPEL5
IRF3	ABL1	ACTB	AHCY	AKR1A1	ANGPTL6	AP2A1	ATL3	ATP6V0A1	AXIN1	BAD	BRK1	CANX	CAPZA1	CCDC9	CCND1	CCT7	CD63	CDC42	CDH1	CEP41	CHD3	CHID1	CIB1	CLINT1	CPSF4	CREB1	CSE1L	CTBP2	CUEDC1	CUEDC2	CUTA	DNAJC7	EIF4H	EMC2	ETFB	FADS2	FBXL12	G3BP2	GCHFR	GDE1	GGNBP2	GNB4	GRB2	GRN	GTF3C5	HSP90AB1	ISOC2	JUP	KCTD20
JUN	AAMP	ABCE1	ABHD11	ABHD2	ACO2	ACOT9	ACTG1	ACY3	AFTPH	AGR3	AHCYL1	AIG1	AKTIP	AMD1	AMOTL2	ANKRD9	ANKS1A	ANXA5	APBB2	APMAP	APTX	ARF1	ARF4	ARFIP2	ARHGEF12	ARID5B	ARL13B	ARL4A	ASAH1	ASPHD1	ATAD2	ATF3	ATL2	ATP1B3	ATP6AP2	B3GAT3	B4GALT3	BAP1	BAZ2A	BCAP29	BCAR3	BCAS2	BECN1	BLVRB	BTG1	BTG2	C19orf48	C1GALT1	C1orf74
JUND	AAMP	AATK	ABAT	ABCA3	ABCE1	ABHD11	ABHD2	ABRACL	ABT1	ACAA2	ACAP3	ACLY	ACOT9	ACOX1	ACOX3	ACTG1	ADAL	ADAM10	ADAM9	ADAMTS3	ADCK5	ADGRB2	ADPGK	AFF4	AFTPH	AGA	AGAP3	AGPAT1	AGPAT3	AGR3	AHCYL1	AHI1	AIG1	AKIRIN1	ALDH18A1	ALG1	ALKBH5	ANKRD12	ANKRD17	ANKRD9	ANKS1A	ANXA5	APEX1	APMAP	APTX	AREG	ARF1	ARF4	ARF5
KDM5B	ABCE1	ABI1	ABL1	ABL2	ACBD5	ACTB	ACTG1	ACTR2	ACTR3	ACTR6	ADIPOR2	AGA	AGO3	AGPAT1	AHCTF1	AHCYL1	AHSA1	AKAP8L	AKAP9	AKIRIN2	ALS2CL	ALYREF	AMD1	AMMECR1L	ANO9	ANP32A	ANXA4	ANXA7	AP1G1	AP2A1	AP3M1	APBB3	APP	ARCN1	ARF1	ARF4	ARFGAP1	ARFGEF2	ARFIP1	ARFIP2	ARHGAP1	ARHGAP12	ARHGEF3	ARHGEF7	ARID2	ARID4A	ARID4B	ARMCX3	ARPC2
KLF4	ANXA2	BBC3	DUSP10	EPHB3	GSN	HNRNPF	MISP	MYH14	MYH9	NECTIN2	NFATC4	SAT1	SOX13	TMCC1
MAZ	ACYP2	AURKAIP1	B3GAT3	BARD1	BHLHB9	BMP4	BUB3	C5orf34	CARD19	CARHSP1	CCP110	CHMP2A	COX5B	CSNK1A1	DDT	DZIP1L	EIF3L	EIF5A	EXOC3	FGFR4	GATA6	GIT1	GLIS2	GNAO1	GNB2	GPAA1	GPANK1	HAND1	HINT1	HMGA1	HMGN2	IFT22	L1CAM	LAMTOR3	LHX2	LIG1	LRRC8D	LRRC8E	LSM1	LUC7L2	MAGOH	MAZ	MGRN1	MIR9-3HG	MPC2	MRPS21	MYBL2	MYO10	NASP
MXI1	ACO2	ADIPOR1	AHCY	ANP32A	APEX1	C1QL4	C5orf24	CCDC85B	CD63	CELSR1	CHMP2A	COPB1	DDIT3	DNAI1	DSN1	EIF1	ELOVL5	FOXO3	GFM2	GNPTG	GSC	H1F0	HNRNPF	HYAL2	IMMT	IMP3	ING1	IVNS1ABP	KATNA1	KIAA0319L	LEPROTL1	LGMN	LSM8	MAGED2	MAN1B1	METTL3	MRPS22	MRPS34	MXI1	MYO6	NAA20	NRCAM	PAAF1	PABPC1	PFDN6	PHB2	PLEKHH3	RACK1	RIC8A
MYC	AAGAB	ABCE1	ABLIM1	ABRACL	ACIN1	ACLY	ACOT13	ACOT7	ACOT8	ACTB	ACTG1	ACTR3	ACVR1	ADORA1	AGAP1	AHNAK	AHSA1	ALDH18A1	ALG10B	ALG5	ALG8	ALKBH2	ALKBH5	ALKBH8	AMD1	ANKRD42	ANKRD9	ANKS3	ANXA4	AP2M1	AP2S1	APEH	APEX1	APP	ARF1	ARFIP2	ARHGAP5	ARL3	ARMC8	ARNT	ARPC2	ARPC3	ASB16-AS1	ASH1L	ASNA1	ASPSCR1	ATF4	ATIC	ATP6AP2
NFYA	ANO1	ARRDC4	BRI3BP	C19orf54	CHTF18	CLPX	EAPP	FARP2	HSF2	IPO11	MAEA	MYH10	NFYA	PSRC1	PTPN13	RPRD2	SOX13	SPTLC2	SRSF6	TBL2	TROAP	ZNF367
NFYB	ABCA7	ABL1	ACAT2	ACIN1	ACO2	ACTB	ACTL6A	ACTN1	ACVR2B	ADAM9	ADD1	AGBL5	AHCY	AIFM1	AIG1	AKTIP	ALDH1A3	ALDH1B1	ALDH5A1	ALKBH7	ANAPC5	ANKRD9	ANP32A	ANP32E	APC2	ARHGAP11A	ARHGEF28	ARID4B	ARL4A	ARMC1	ASB6	ASF1B	ASIC1	ASNA1	ASPM	ATAD2	ATF4	ATF5	ATRX	AURKA	AURKB	B9D2	BARD1	BAZ2A	BCAT2	BCL7C	BCOR	BDH1	BEST1
NR3C1	ADGRL2	ANP32B	BEX1	BEX3	BRMS1L	BSN	CBX6	CNTFR	CSDE1	CXXC1	DEK	EEF2	FTSJ3	FZD6	HINT1	HMGB2	HNRNPA3	ILKAP	KPNA6	LMNB1	MLST8	MRPL22	MRPL52	NCL	NOVA1	NR3C1	P4HTM	PART1	PPP1CC	PSMD8	RAB7A	RACK1	RAD21	RPL12	RPS19	RPS2	RPS7	SASS6	2020-09-02	SMC4	SRRM1	SYNE2	TCF25	TEAD3	TUBB4B	TYW3	UBE2E2	UBE2M	UROD
PBX3	ATXN7L3	AZIN1	B4GALT3	C4orf46	CDCA3	CDK2	CDV3	CENPA	CKS1B	COX7A2L	CRK	CTF1	EML3	EP300	EPM2AIP1	EZH2	FGD1	FMN1	ID2	KAT6B	PBX3	PLCE1	RAB27A	RORC	SLC35F5	SMCHD1	STXBP3	TOP2B	TROAP
RELA	AAK1	ADAM15	ANKH	BAZ2A	C12orf75	CAND1	CCT7	CGGBP1	CHD2	COPA	COX8A	CPSF7	CRIPT	DBNL	DLST	EIF3D	EIF4G2	ERGIC2	FAM107B	GNAI3	GTF3A	GTPBP4	HSPE1	ISY1	ITPA	KDM5A	LIMK2	LYN	MARK2	MUL1	NFAT5	OSGEPL1	PIK3R1	PNISR	POP5	PPP1R9B	PRKACB	PRKAG2	PRKCSH	RELA	REST	ROMO1	RPL23	RPS19BP1	SBNO2	SEC16A	SF3A1	SIRT7	SNX3
RFX5	ADAMTS4	AKAP6	ALG12	ATF2	ATF5	ATRX	AURKA	C12orf57	C6orf99	CCNF	CDC20	CDC25C	CDKN3	CENPF	CIT	CKAP2L	CKAP5	CKS2	CNOT6	COX7B	CPTP	CTNND1	DBI	DGKZ	DPP10	DYNLL1	ECT2	EIF4G2	ELOVL5	EMC9	ETFB	GNB2	HMG20B	HMGB1	HMGB3	HMGN2	HNRNPA1	HNRNPK	HNRNPUL1	IGSF9	ILF2	KCNK12	LGALS1	LUC7L2	MAP3K13	MDC1	MIER3	MRPL51	NCAPD2
SP1	AGFG2	ANKRD9	ASF1B	ATM	C1orf174	CCDC189	CCDC9	CDC6	CDKN3	CHTOP	DERL2	FAM86B1	FOXN2	INTS7	MAN2B1	MCM3	NCL	PCNA	PPM1A	PRSS36	PYY	RANBP1	SP1	SP2	SRP9	TMTC4	ZBTB7B	ZNF335
SP2	ARHGAP11A	ARID3B	ARNT	ASPM	ATP6V1E1	BCLAF1	CAND1	CBX1	CCNH	CDC27	CENPF	CGGBP1	CHIC2	CSE1L	DLD	DPH6	DPP8	GAS2L3	GCHFR	H2AFX	HEATR6	HMGB2	HMMR	KANSL1	KIF14	KIF20B	METTL14	MOCS2	NDE1	NR2C2	NUDT1	PRELID1	PRKACB	RNF157	RPS26	SAPCD2	SECISBP2	SOS1	SP2	STARD3NL	STK38L	SUGT1	TACC3	TAX1BP1	TDP1	TMEM167A	TPX2	USP3	VMA21
SPDEF	AAK1	AATF	ABHD17C	ABI1	ACBD3	ACIN1	ACOT7	ACTB	ACTG1	ACTR2	ACTR6	ACYP2	ADAM15	ADARB1	ADGRB2	ADGRG1	ADPRHL2	AFF1	AFF3	AGO1	AGPAT1	AGPAT3	AGRN	AHNAK	AHSA1	AKIRIN2	AKT2	ALKBH3	ANAPC11	ANKMY1	ANKMY2	ANKS3	ANXA4	AP1B1	AP1G1	AP2S1	APBB2	APEH	APEX2	APP	APTX	AQR	ARAP3	ARF1	ARFIP2	ARHGAP1	ARHGAP27	ARHGDIB	ARHGEF5
SREBF2	ABHD3	ABLIM1	ABRACL	ACBD3	ACIN1	ACO2	ACTG1	ACTN4	ACTR1A	ADAM15	ADIPOR1	AHCYL1	AKAP9	AKIRIN2	AKR1A1	AKT1	ALDH3B1	ANAPC16	ANKMY1	ANKRD16	ANKRD17	AP1B1	AP1G1	AP2S1	AP3D1	APMAP	ARCN1	ARF1	ARF4	ARFIP2	ARHGAP39	ARPC3	ARRB1	ASH1L-AS1	ATAD2	ATG101	ATG13	ATG2A	ATG4D	ATP6V0D1	ATP6V1E1	ATXN2	AURKAIP1	B3GAT3	BAZ1B	BLOC1S1	BTBD7	BTRC	C11orf24
SRF	ACTG1	ACTR6	BCL3	BMI1	C6orf89	CDK11B	DDX21	FBXO28	GNAI3	HEATR6	IPO11	KBTBD2	KIAA0825	NCAPD2	NCSTN	NR4A1	NUDCD2	PNISR	SEMA3F	SLC45A3	SNRPB2	SRF	TAOK3	TMUB2	TPM3	TRAPPC1	TYW1B	VASP	VMP1	VPS9D1	YKT6
TEAD2	CARD19	CIB1	COX6B2	DNAJC22	DRAP1	ECSIT	ELL2	FAM118A	FKBP2	GPR137	HIST1H1E	IGSF8	KIAA0895L	LDB1	MBD6	MROH6	NXPH4	RFXANK	S100A13	SMARCD2	TEAD2	TM2D2	TMED1
TFDP1	ABCE1	ABHD10	ABHD2	ACAP3	ACBD6	ACTB	ACTL6A	ADIPOR1	AGAP6	AGBL5	AHCTF1	AHCY	AK2	AKAP7	ANAPC11	ANAPC13	ANKRD28	ANKS1A	ANLN	ANP32B	ANP32E	ANXA5	AP2S1	ARF5	ARF6	ARHGEF12	ARHGEF26	ARID4A	ARPP19	ARRB1	ARRB2	ASAP1	ASB16-AS1	ASPM	ASTN2	ASXL1	ATAD2	ATAD5	ATL3	ATP1B3	AURKB	AZIN1	BARD1	BAZ1A	BAZ1B	BBIP1	BCAS2	BCHE	BMPR1A
THAP1	ACTB	AP4S1	APBB3	ARPC3	ATF4	ATP6V1C1	B3GAT3	BANF1	C12orf65	CCAR1	CCDC183-AS1	CD164	CGGBP1	CSTF2T	DNAJC13	DST	EEF2	EIF5	FAM107B	GABARAPL2	GTF3C6	H1F0	HARS	HNRNPA2B1	HOOK2	HSBP1	ILF3	INSIG2	JUP	KANSL1L	KIAA0232	LARS2	MCL1	MFSD10	MRPL51	NAT9	NDUFS3	NELFE	NORAD	PABPC1	PDHB	PFDN6	PHB2	PPP1R21	PPP2R5E	PPTC7	PRKCSH	PSMG3	RAB1A
THAP11	AAK1	ABHD2	ABR	ACADVL	ADARB1	ADK	ADO	ADORA1	AGAP1	ALYREF	AMZ1	APBA3	ARHGEF16	ARHGEF17	ARSK	ASTN2	ASXL1	ATG4C	ATP6V0B	ATPAF2	ATXN1	AUP1	BACE1	BCKDK	BIRC5	BUB3	C12orf43	C1orf198	C8orf76	CBX1	CCDC117	CCM2L	CCR6	CCT7	CDC42BPG	CDC42EP4	CDC6	CDK16	CEP112	CEP290	CHD7	CHMP4B	CLPX	CNOT1	CNPY2	CXXC5	CYB561A3	DAZAP1	DDX49
USF1	ANKRD17	ANKRD9	APH1A	ARMCX3	BCAR3	BCAS2	BROX	C15orf48	CANX	CDC42	CNOT7	COMMD1	CTSA	DIRC2	EIF1B	EIF5A	EMC4	EXOSC9	FAM49B	FAU	FDPS	HCFC1R1	HMGB3	HNRNPH3	HOXA2	HPS4	IRF2BP1	KDM7A	KIF1B	KMT2E	LCMT1	LMAN2	LMNB1	LONP1	LRPPRC	LRRC57	LSM2	MIRLET7BHG	MLF2	MTDH	MYL12A	OST4	PDHA1	PEF1	PFDN2	PPP2R5A	PSMB2	PUM3	RAB21
USF2	ABT1	ACO2	ADIPOR1	AFTPH	AHCY	AHCYL1	APBB2	APEX1	APTX	ARHGAP12	ARMCX6	ARMT1	ASNA1	ATG3	ATG5	ATP6V0B	AZIN1-AS1	BDH1	BECN1	BET1	BMS1	BPTF	C12orf73	C16orf72	C19orf48	C19orf70	C1orf43	C6orf62	C9orf3	CCAR1	CCDC126	CCT4	CD164	CD63	CDK2AP2	CDK4	CDV3	CENPE	CENPW	CHPF	CLCN7	CMSS1	COMMD1	COMTD1	CTU2	CUTA	CXCL16	CXXC5	CYCS
YY1	AAAS	AAR2	AATF	ABCC5	ABCE1	ABHD17A	ABL2	ACAA2	ACBD3	ACIN1	ACLY	ACOT7	ACOT8	ACSF3	ACTB	ACTG1	ACTN1	ACTR1A	ACTR2	ACTR3	ACVR1B	ACVR2A	ACYP1	ADAM15	ADAM17	ADAM22	ADAMTS1	ADAR	ADD1	ADGRL2	ADIPOR1	ADIPOR2	ADK	ADPRHL2	ADRM1	AFF3	AFTPH	AGA	AGFG1	AGPAT3	AHCTF1	AHCY	AHCYL1	AHSA1	AIFM1	AK3	AKAP13	AKAP8	AKAP8L
ZBTB7A	AAMDC	ACER3	ACO2	ANO10	ARF1	ARF5	ATF7IP	AZIN1	CAD	CAST	CCDC159	CCT3	CD2AP	CDK19	CREM	DDAH2	DNAJB1	DNPEP	EIF4G1	EMD	FBRS	GBF1	GNPNAT1	GOLGA5	GRB2	GTF2IRD1	HDAC6	HMG20B	HMGXB3	HSP90AB1	ISOC2	ISYNA1	JADE2	KCNK6	KIAA0930	LMNA	LRP1	MAGED2	MARCKSL1	MBOAT7	MIDN	MIEF1	MPP2	NCOR2	NDFIP1	NECTIN2	NFIC	NMNAT3	NUBP1
[truncated: 2,375 more columns]

## Sheet: README
SCENIC Regulon Activation: Binarized activation of regulons from AUCell scores for each bulk cell line. 1 stands for activated; 0 stands for inactivated
SCENIC Deduced Regulons: target genes of regulon from SCENIC; certain gene is included if it is deduced in regulon in one of the three ILC cell lines (MM134, SUM44, BCK4) or T47D KO cells
